# Supplementary material for: Synthesis, X-ray characterization and DFT analysis of dicyanidoaurate telluronium salts: on the importance of charge assisted chalcogen bonds
Source: Royal Society of Chemistry journal article supplement (doi:10.1039/d3dt02787b), 2023-01-01
Supplement: d3dt02787b1.pdf [file d3dt02787b1.pdf]

## SUPPLEMENTARY INFORMATION

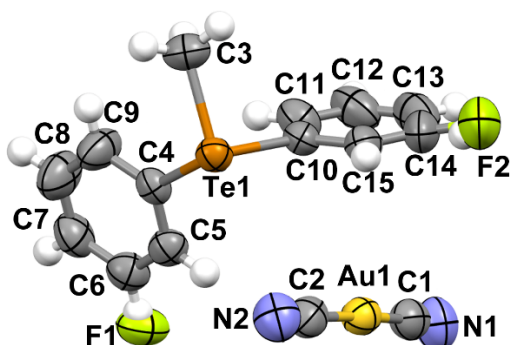

**Figure 1.** Ellipsoid plot of the asymmetric unit of salt **1** (50% probability).

**Table 1.** Crystal data and structure refinement for **1**.

|                                                              |                                                                              |
|--------------------------------------------------------------|------------------------------------------------------------------------------|
| Empirical formula                                            | C <sub>15</sub> H <sub>12</sub> AuFN <sub>2</sub> Te                         |
| Formula weight                                               | 563.83                                                                       |
| Temperature/K                                                | 298.00                                                                       |
| Crystal system                                               | monoclinic                                                                   |
| Space group                                                  | <i>P</i> 2 <sub>1</sub> / <i>n</i>                                           |
| <i>a</i> /Å                                                  | 9.5046(4)                                                                    |
| <i>b</i> /Å                                                  | 13.2604(2)                                                                   |
| <i>c</i> /Å                                                  | 13.3332(3)                                                                   |
| $\alpha$ /°                                                  | 90                                                                           |
| $\beta$ /°                                                   | 109.638(3)                                                                   |
| $\gamma$ /°                                                  | 90                                                                           |
| Volume/Å <sup>3</sup>                                        | 1582.71(8)                                                                   |
| <i>Z</i>                                                     | 4                                                                            |
| $\rho_{\text{calc}}$ /cm <sup>3</sup>                        | 2.366                                                                        |
| $\mu$ /mm <sup>-1</sup>                                      | 31.743                                                                       |
| <i>F</i> (000)                                               | 1024.0                                                                       |
| Crystal size/mm <sup>3</sup>                                 | 0.11 × 0.1 × 0.05                                                            |
| Radiation                                                    | Cu K $\alpha$ ( $\lambda$ = 1.54184)                                         |
| 2 $\theta$ range for data collection/°                       | 9.7 to 133.75                                                                |
| Index ranges                                                 | -10 ≤ <i>h</i> ≤ 8, -15 ≤ <i>k</i> ≤ 14, -15 ≤ <i>l</i> ≤ 15                 |
| Reflections collected                                        | 8706                                                                         |
| Independent reflections                                      | 2484 [ <i>R</i> <sub>int</sub> = 0.0362, <i>R</i> <sub>sigma</sub> = 0.0295] |
| Data/restraints/parameters                                   | 2484/0/191                                                                   |
| Goodness-of-fit on <i>F</i> <sup>2</sup>                     | 1.066                                                                        |
| Final <i>R</i> indexes [ <i>I</i> ≥ 2 $\sigma$ ( <i>I</i> )] | <i>R</i> <sub>1</sub> = 0.0428, <i>wR</i> <sub>2</sub> = 0.1127              |
| Final <i>R</i> indexes [all data]                            | <i>R</i> <sub>1</sub> = 0.0457, <i>wR</i> <sub>2</sub> = 0.1164              |
| Largest diff. peak/hole / e Å <sup>-3</sup>                  | 1.72/-1.28                                                                   |

**Table 2.** Bond Lengths for **1**.

| Atom | Atom | Length/Å  | Atom | Atom | Length/Å   |
|------|------|-----------|------|------|------------|
| Au1  | C1   | 1.971(10) | C6   | F1   | 1.268(10)  |
| Au1  | C2   | 1.965(9)  | C11  | C12  | 1.376(10)  |
| Te1  | C4   | 2.112(6)  | C8   | C9   | 1.399(10)  |
| Te1  | C10  | 2.119(8)  | C7   | C8   | 1.348 (20) |
| Te1  | C3   | 2.116(9)  | C15  | C14  | 1.357(20)  |
| C4   | C5   | 1.381(10) | C12  | C13  | 1.337(20)  |

|     |     |           |  |     |     |            |
|-----|-----|-----------|--|-----|-----|------------|
| C4  | C9  | 1.372(10) |  | C13 | C14 | 1.394 (10) |
| C10 | C11 | 1.381(10) |  | C14 | F2  | 1.328(20)  |
| C10 | C15 | 1.388(10) |  | C1  | N1  | 1.130(10)  |
| C5  | C6  | 1.370(10) |  | C2  | N2  | 1.142(10)  |
| C6  | C7  | 1.392(10) |  |     |     |            |

**Table 3.** Bond Angles for **1**.

| Atom | Atom | Atom | Angle/°  | Atom | Atom | Atom | Angle/°  |
|------|------|------|----------|------|------|------|----------|
| C1   | Au1  | C2   | 176.5(4) | F1   | C6   | C7   | 118.0(9) |
| C4   | Te1  | C10  | 95.0(3)  | C12  | C11  | C10  | 119.2(8) |
| C3   | Te1  | C4   | 97.9(3)  | C7   | C8   | C9   | 121(1)   |
| C3   | Te1  | C10  | 93.6(3)  | C4   | C9   | C8   | 119 (1)  |
| C5   | C4   | Te1  | 117.4(5) | C14  | C15  | C10  | 119.2(9) |
| C9   | C4   | Te1  | 122.3(6) | C12  | C13  | C14  | 118(1)   |
| C9   | C4   | C5   | 120.2(8) | C13  | C12  | C11  | 122(1)   |
| C11  | C10  | Te1  | 122.2(6) | C8   | C7   | C6   | 118.9(9) |
| C11  | C10  | C15  | 119.5(7) | C15  | C14  | C13  | 122(1)   |
| C15  | C10  | Te1  | 118.2(6) | F2   | C14  | C15  | 121 (1)  |
| C6   | C5   | C4   | 119.4(7) | F2   | C14  | C13  | 116(1)   |
| C7   | C6   | C5   | 121.1(8) | N2   | C2   | Au1  | 179.1(9) |
| F1   | C6   | C5   | 120.9(9) | N1   | C1   | Au1  | 176.3(9) |

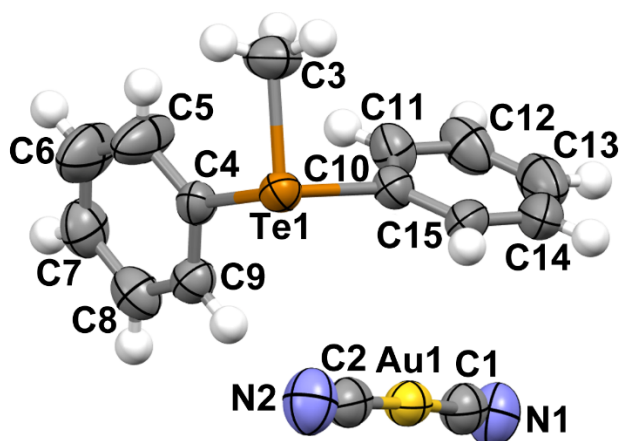

**Figure 2.** Ellipsoid plot of the asymmetric unit of salt **2** (50% probability)

**Table 4.** Crystal data and structure refinement for **2**.

|                   |                                                     |
|-------------------|-----------------------------------------------------|
| Empirical formula | C <sub>15</sub> H <sub>13</sub> AuN <sub>2</sub> Te |
| Formula weight    | 545.84                                              |
| Temperature/K     | 298.00                                              |
| Crystal system    | monoclinic                                          |
| Space group       | <i>P</i> <sub>2</sub> <sub>1</sub> / <i>n</i>       |
| <i>a</i> /Å       | 9.2490(2)                                           |
| <i>b</i> /Å       | 13.2961(2)                                          |
| <i>c</i> /Å       | 13.4912(3)                                          |
| $\alpha$ /°       | 90                                                  |
| $\beta$ /°        | 108.514(2)                                          |

|                                                |                                                               |
|------------------------------------------------|---------------------------------------------------------------|
| $\gamma/^\circ$                                | 90                                                            |
| Volume/ $\text{\AA}^3$                         | 1573.21(6)                                                    |
| Z                                              | 4                                                             |
| $\rho_{\text{calc}}/\text{g/cm}^3$             | 2.305                                                         |
| $\mu/\text{mm}^{-1}$                           | 31.808                                                        |
| F(000)                                         | 992.0                                                         |
| Crystal size/ $\text{mm}^3$                    | $0.8 \times 0.7 \times 0.12$                                  |
| Radiation                                      | Cu K $\alpha$ ( $\lambda = 1.54184$ )                         |
| 2 $\theta$ range for data collection/ $^\circ$ | 9.594 to 133.582                                              |
| Index ranges                                   | $-10 \leq h \leq 9, -15 \leq k \leq 15, -16 \leq l \leq 15$   |
| Reflections collected                          | 16022                                                         |
| Independent reflections                        | 2725 [ $R_{\text{int}} = 0.0529, R_{\text{sigma}} = 0.0244$ ] |
| Data/restraints/parameters                     | 2725/0/174                                                    |
| Goodness-of-fit on $F^2$                       | 1.069                                                         |
| Final R indexes [ $I \geq 2\sigma(I)$ ]        | $R_1 = 0.0400, wR_2 = 0.1075$                                 |
| Final R indexes [all data]                     | $R_1 = 0.0425, wR_2 = 0.1108$                                 |
| Largest diff. peak/hole / $e \text{\AA}^{-3}$  | 1.32/-1.99                                                    |

**Table 5.** Bond lengths for **2**.

| Atom | Atom | Length/ $\text{\AA}$ | Atom | Atom | Length/ $\text{\AA}$ |
|------|------|----------------------|------|------|----------------------|
| Te1  | C4   | 2.108(5)             | C11  | C12  | 1.374(10)            |
| Te1  | C10  | 2.132(6)             | C10  | C15  | 1.376(8)             |
| Te1  | C3   | 2.116(6)             | C15  | C14  | 1.374(10)            |
| Au1  | C1   | 1.979(8)             | C1   | N1   | 1.131(9)             |
| Au1  | C2   | 1.960(9)             | C5   | C6   | 1.392(12)            |
| C4   | C9   | 1.374(9)             | C2   | N2   | 1.175(10)            |
| C4   | C5   | 1.363(10)            | C6   | C7   | 1.357(12)            |
| C9   | C8   | 1.396(10)            | C14  | C13  | 1.327(13)            |
| C8   | C7   | 1.360(11)            | C13  | C12  | 1.411(12)            |
| C11  | C10  | 1.384(9)             |      |      |                      |

**Table 6.** Bond angles for **2**.

| Atom | Atom | Atom | Angle/ $^\circ$ | Atom | Atom | Atom | Angle/ $^\circ$ |
|------|------|------|-----------------|------|------|------|-----------------|
| C4   | Te1  | C10  | 95.3(2)         | C15  | C10  | Te1  | 118.0(5)        |
| C4   | Te1  | C3   | 97.2(3)         | C15  | C10  | C11  | 121.1(6)        |
| C3   | Te1  | C10  | 94.0(3)         | C14  | C15  | C10  | 117.9(7)        |
| C2   | Au1  | C1   | 176.8(3)        | N1   | C1   | Au1  | 177.6(7)        |
| C9   | C4   | Te1  | 117.6(4)        | C4   | C5   | C6   | 119.4(8)        |
| C5   | C4   | Te1  | 122.8(5)        | N2   | C2   | Au1  | 178.2(6)        |
| C5   | C4   | C9   | 119.5(6)        | C7   | C6   | C5   | 121.2(7)        |
| C4   | C9   | C8   | 120.4(6)        | C6   | C7   | C8   | 119.7(7)        |
| C7   | C8   | C9   | 119.7(7)        | C13  | C14  | C15  | 122.6(8)        |
| C12  | C11  | C10  | 119.7(7)        | C14  | C13  | C12  | 120.1(7)        |
| C11  | C10  | Te1  | 120.9(4)        | C11  | C12  | C13  | 118.6(7)        |

**Table 7.** Vibrational data for **1**, **2**, **3a** and **3b**

| <b>3b</b> |         | <b>2</b> |        | <b>3a</b> |       | <b>1</b> |        | Assignment                    |
|-----------|---------|----------|--------|-----------|-------|----------|--------|-------------------------------|
| IR        | Raman   | IR       | Raman  | IR        | Raman | IR       | Raman  |                               |
| 3150 w    | 3150 w  | 3149 w   | 3149 w | 3154 vw   |       | 3149 vw  | 3149 w | $\nu_{\text{CH}}(\text{C}_6)$ |
| 3090 m    | 3090 sh |          |        | 3091 sh   |       |          |        |                               |
|           |         | 3078 m   |        |           |       | 3078 w   | 3078 m |                               |
|           | 3065 s  | 3068 m   |        | 3064 w    |       |          |        |                               |
| 3057 s    |         | 3045 s   | 3055 s |           |       | 3056 m   | 3058 s |                               |
|           |         | 3036 sh  | 3036 w |           |       | 3045 m   | 3042 m |                               |
| 3024 sh   | 3024 vw |          | 3027 m |           |       | 3026 w   |        |                               |

|                               |                            |                                                |                              |                                                             |                                         |                                                         |                                |                                                   |
|-------------------------------|----------------------------|------------------------------------------------|------------------------------|-------------------------------------------------------------|-----------------------------------------|---------------------------------------------------------|--------------------------------|---------------------------------------------------|
| 2997 w<br>2957 m              | 3000 vw                    | 2992 w<br>2960 w<br>2951 w<br>2945 w<br>2929 m |                              | 2998 vw<br><br>2953 w<br><br>2918 m<br>2874 w<br><br>2850 m |                                         | 2953 w<br><br>2931 sh<br>2918 s<br>2874 w<br><br>2850 s | 2934 m                         | $\nu_{\text{CH}}(\text{CH}_3)$                    |
|                               |                            | 2158 m<br>2137 vvs                             | 2158 s<br>2137 w             |                                                             |                                         | 2158 vw<br>2138 vs                                      | 2158 vs<br>2138 vw             | $\nu_{\text{CN}}$                                 |
| 1575 w<br>1481 m<br>1438 s    | 1578 m<br>1485 w<br>1438 w | 1573 m<br>1477 s<br>1432 s                     | 1578 m<br>1478 w             | 1588 s<br>1576 m<br>1474 s<br>1439 m<br>1426 m<br>1414 sh   | 1593 m<br>1577 m<br>1479 vw<br>1441 vvw | 1585 s<br>1575 m<br>1471 s<br>1435 m                    | 1590 vw<br>1576 w<br>1480 w    | $\nu_{\text{C-C}}$                                |
| 1419 w<br>1396 w<br>1337 w    |                            | 1419 m<br>1390 w<br>1331 m                     | 1421 vw<br>1394 w<br>1334 vw | 1336 w                                                      | 1336 vw                                 | 1416 m<br><br>1331 w                                    |                                |                                                   |
| 1286 w<br>1269 w              |                            | 1303 w<br><br>1269 w                           | 1270 vw                      | 1308 w<br>1285 w<br>1271 w<br>1227 m                        | 1309 w<br><br>1271 w<br>1229 w          | 1301 w<br><br>1268 m<br>1229 m                          | 1268 w<br>1229 w               | $\beta_{\text{CH}}$                               |
| 1240 vw                       |                            | 1220 m                                         |                              |                                                             |                                         |                                                         |                                |                                                   |
|                               |                            |                                                |                              | 1218 m                                                      | 1218 w                                  | 1219 s                                                  | 1219 sh                        | $\nu_{\text{C-F}}$                                |
|                               | 1198 w                     |                                                |                              |                                                             |                                         |                                                         |                                |                                                   |
| 1185 w<br>1163 vw             | 1185 w<br>1164 w           | 1179 w                                         | 1192 w                       | 1185 w<br><br>1166 w                                        | 1188 vw<br><br>1168 w<br>1089 w         | 1185 w<br><br>1162 m<br>1085 m                          | 1188 w<br><br>1160 w<br>1085 w | $\delta_{\text{CH}_3}$<br><br>$\beta_{\text{CH}}$ |
| 1046 vs<br>1031 vs<br>1015 vs |                            |                                                |                              | 1044 vs<br>1028 vs                                          |                                         |                                                         |                                | $\nu_{\text{B-F}}$                                |
|                               | 1021 m                     | 1018 m                                         | 1022 s                       |                                                             | 1021 m                                  | 1020 m                                                  | 1021 m                         | $\beta_{\text{CH}}$                               |
| 996 vs<br>976 sh              | 1002 s                     | 996 s                                          | 1000 vs                      | 995 vs                                                      | 1000 vs                                 | 997 m                                                   | 999 vs                         | Ring                                              |
| 915 m<br><br>867 m            |                            | 966 m<br>911 m<br><br>862 s                    | 918 w<br>904 w<br>864 w      | 918 m<br><br>876 m                                          |                                         | 912 w<br><br>861 m                                      |                                | $\gamma_{\text{CH}}$                              |
| 845 sh                        |                            | 845 m                                          | 847 vw                       | 848 s                                                       | 851 w                                   | 847 m                                                   | 851 w                          | $\rho_{\text{CH}_3}$                              |
|                               |                            | 832 w                                          |                              |                                                             |                                         |                                                         |                                | $\gamma_{\text{CH}}$                              |
|                               |                            |                                                |                              | 787 m                                                       |                                         | 779 m                                                   |                                | C-F                                               |
| 743 s<br>732 s                | 767 w                      |                                                | 740 vw                       | 766 w<br>736 s                                              | 767 m                                   | 730 s                                                   |                                | $\gamma_{\text{CH}}$                              |
| 687 s                         |                            | 685 vs                                         | 687 vw                       | 685 sh<br>676 m<br>655 w                                    | 678 vw<br>659 s                         | 683 m<br>672 s<br>653 w                                 | 659 m                          | $\varphi_{\text{C-C}}$                            |
| 613 vw                        | 662 s                      |                                                | 660 s                        |                                                             |                                         |                                                         |                                | $\alpha_{\text{C-C-C}}$                           |
| 543 vw                        | 614 w                      | 613 vw                                         | 615 w                        | 614 w                                                       | 614 w                                   | 538 w                                                   | 539 s                          | $\nu_{(\text{CH}_3)\text{-Te}}$                   |
| 520 m                         | 544 s                      | 539 w                                          | 541 vs                       | 544 w                                                       | 544 s                                   |                                                         |                                | $\delta_{\text{B-F}}$                             |
|                               | 520 sh                     |                                                |                              |                                                             |                                         |                                                         |                                |                                                   |
|                               |                            |                                                |                              | 520 m                                                       | 523 m                                   | 521 m                                                   | 524 w                          |                                                   |
|                               |                            |                                                |                              | 498 vw                                                      |                                         |                                                         |                                | C-F                                               |
| 464 m<br>444 w                |                            | 458 m<br>445 s                                 | 461 w                        | 453 vw<br>438 m                                             |                                         | 453 m                                                   | 453 w                          |                                                   |
|                               |                            |                                                |                              | 430 w                                                       |                                         |                                                         |                                | C-F                                               |
|                               |                            | 427 m                                          |                              |                                                             |                                         | 425 vs                                                  |                                |                                                   |
|                               |                            |                                                |                              | 352 vw                                                      | 352 w                                   |                                                         |                                |                                                   |

|       |        |       |                 |        |        |       |                 |                       |
|-------|--------|-------|-----------------|--------|--------|-------|-----------------|-----------------------|
|       |        |       | 304 sh<br>298 m |        |        |       | 304 m<br>300 sh | $\beta_{\text{CN}}$   |
|       | 281 m  |       |                 |        |        |       |                 |                       |
|       |        | 269 w | 273 m           | 269 sh | 270 s  |       | 269 s           | $V_{\text{symTe-C}}$  |
| 262 m | 259 m  | 259 m | 261 s           | 258 w  | 259 sh | 258 m | 258 vs          | $V_{\text{asymTe-C}}$ |
|       | 247 m  | 245 w | 240 w           | 243 sh | 243 s  | 243 w | 243 s           |                       |
|       | 231 sh | 235 w | 234 m           |        |        |       |                 |                       |
|       |        |       |                 |        | 211 m  |       | 210 s           |                       |
|       | 186 w  | 185 m | 185 w           |        |        |       |                 |                       |
|       |        |       |                 | 166 w  | 166 m  | 161 m |                 |                       |

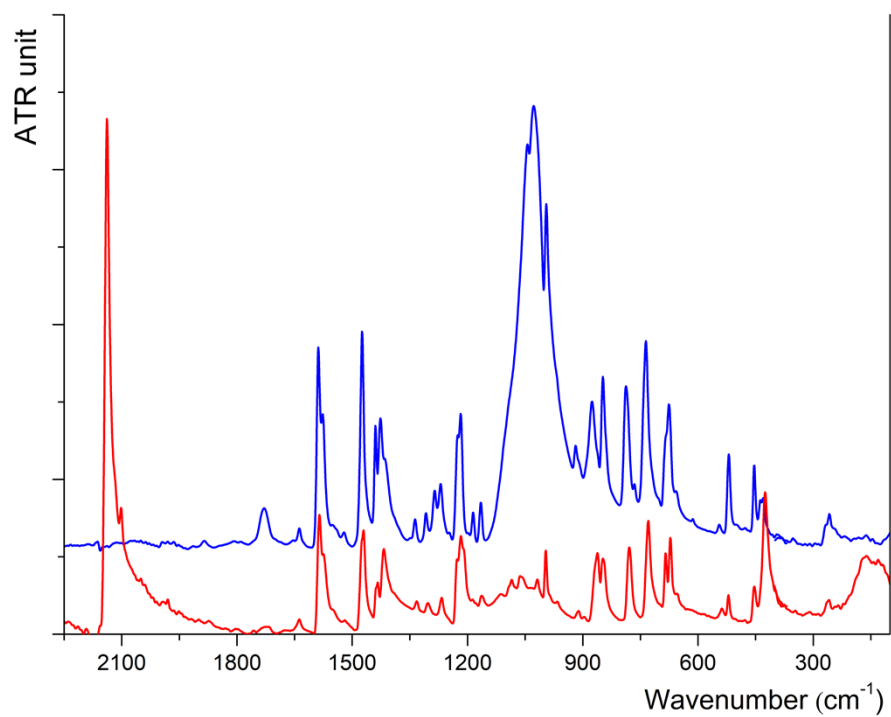

**Figure 3.** FT-ATR spectra of **1** (in red) and **3a** (in blue).

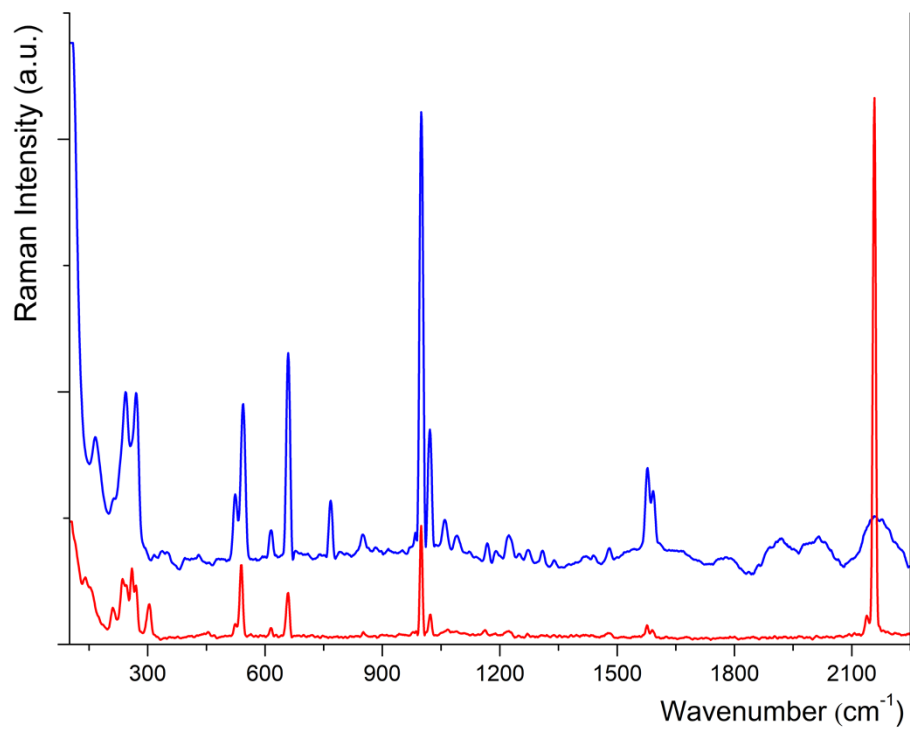

**Figure 4.** Raman spectra of **1** (in red) and **3a** (in blue).

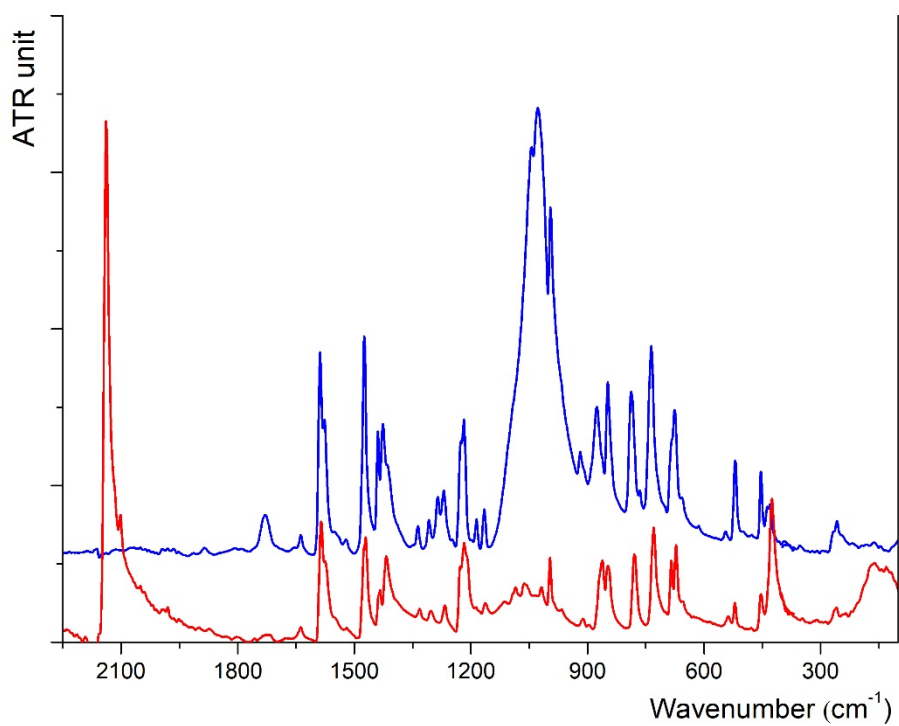

**Figure 5.** FT-ATR spectra of **2** (in red) and **3b** (in blue).

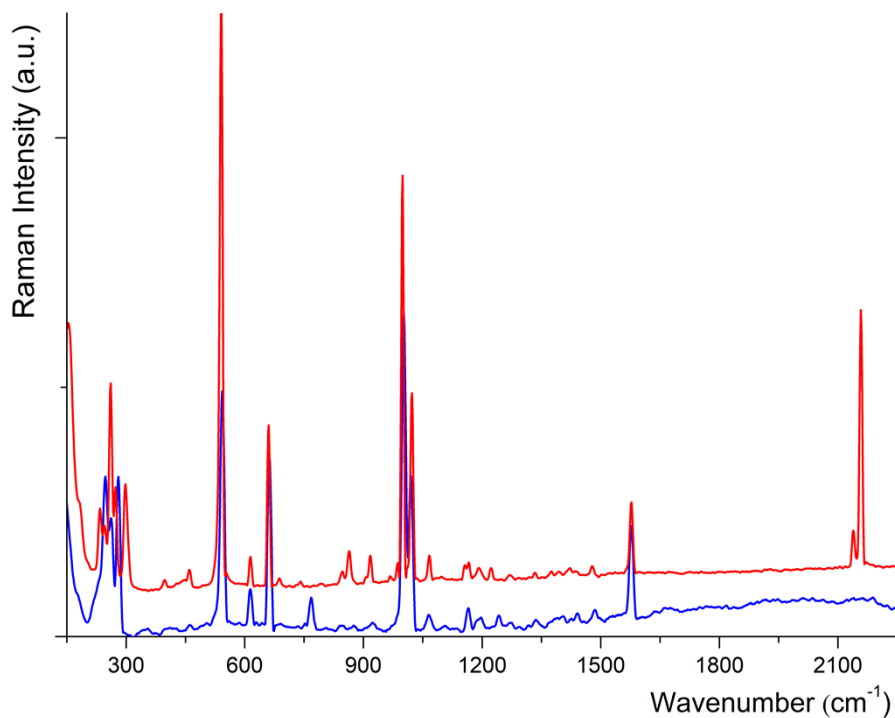

**Figure 6.** Raman spectra of **2** (in red) and **3b** (in blue).

### Synthesis and analysis of compound **3a** and **3b**

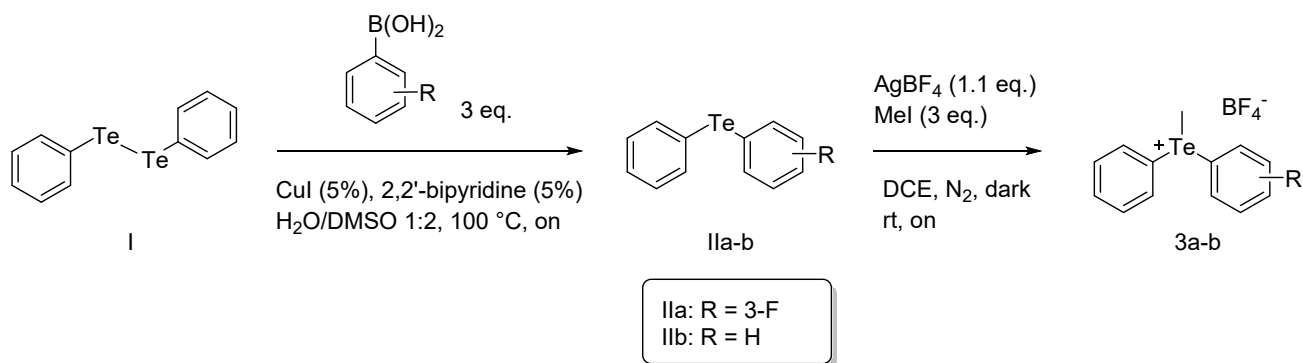

**Scheme 1.** Synthesis of methyldiaryltelluronium tetrafluoroborate salts **3a-b**.

### General Information

**Materials.** Unless specified, all reagents were used as received without further purifications. Reactions were monitored by GC-MS analysis and/or by thin-layer chromatography (TLC) carried out on 0.25 mm silica gel coated aluminium plates (60 Merck F254) with UV light (254 nm) as visualizing agent. Chromatographic separations were carried out under pressure on silica gel (40-63  $\mu\text{m}$ , 230-400 mesh) using flash-column techniques.

**Instrumentation.**  $^1\text{H}$  NMR (600 MHz),  $^{13}\text{C}\{^1\text{H}\}$  (150 MHz),  $^{19}\text{F}$  NMR (564 MHz),  $^{11}\text{B}$  (192 MHz) spectra were recorded on a Jeol ECZR600 spectrometer at room temperature using residual solvent peak as an internal reference. Chemical shifts ( $\delta$ ) are given in parts per million (ppm) and coupling constants (J) in Hertz (Hz). Multiplicities are reported as follows: s (singlet), d (doublet), t (triplet), quint (quintet), sext (sextet), sept (septet), m (multiplet), br (broad). GC analyses were performed on a PerkinElmer Autosystem XL chromatographic system equipped with a methyl silicone capillary column. Mass spectra were obtained on a Shimadzu QP 1000 instrument (EI, 70 eV) and on a Bruker maXis 4G instrument (ESI-TOF, HRMS).

### Synthesis of diaryltellane

**General procedure.** Diaryltellane were synthesized following the reported procedure.<sup>[1]</sup> In a 10 mL capacity round bottom flask, diphenylditelluride **I** (1.0 eq., 100 mg, 0.24 mmol), CuI (0.05 eq., 2 mg, 0.012 mmol), 2,2'-bipyridine (0.05 eq., 2 mg, 0.012 mmol), the appropriate phenylboronic acid (3-fluorophenylboronic acid for **Ila** and phenylboronic acid for **Ilb**) (3.0 eq., 0.72 mmol) were sequentially added in  $\text{H}_2\text{O}/\text{DMSO}$  1:2 solution (1 mL). The reaction mixture was stirred at  $100^\circ\text{C}$  overnight. Then, reaction mixture was poured in water (5 mL) and extracted with ethyl acetate (3x5 mL). Combined organic layer was dried over ( $\text{Na}_2\text{SO}_4$ ) and evaporated under reduced pressure. Crude mixture was purified by column chromatography (pure hexane) to provide the pure diaryltellane.

### Synthesis and analysis of methyldiaryltelluronium tetrafluoroborate salts (**3a** and **3b**)

**General procedure.** Methyldiaryltelluronium tetrafluoroborate salt **3a** and **3b** were synthesized following the reported procedure.<sup>[2]</sup> In a 10 mL capacity round bottom flask, the selected diaryltellane (1.0 eq., 0.35 mmol),  $\text{AgBF}_4$  (1.1 eq., 74 mg, 0.38 mmol) were dissolved and stirred in anhydrous DCE (4 mL) under nitrogen. Then MeI (3 eq., 62  $\mu\text{L}$ , 1 mmol) was added and the mixture was stirred overnight, in the dark at room temperature. The mixture was filtrated through a celite pad to remove AgI and it was washed with acetonitrile (15 mL). The filtrate was evaporated under reduced pressure to give crude methyldiaryltelluronium tetrafluoroborate salt **3a-b**, that was purified by trituration with DCM.

**(3-Fluorophenyl)(methyl)(phenyl)telluronium tetrafluoroborate (3a):** according to the general procedure starting from fluorophenyl-phenyltellane, white solid (80%, 112 mg).  $^1\text{H}$  NMR (600 MHz,  $\text{CD}_3\text{COCD}_3$ ):  $\delta$  7.93-7.91 (m, 2H), 7.73-7.69 (m, 2H), 7.67-7.63 (m, 2H), 7.61-7.59 (m, 2H), 7.43-7.40 (m, 1H), 3.10 (s, 3H).  $^{13}\text{C}\{^1\text{H}\}$  NMR (150 MHz,  $\text{CD}_3\text{COCD}_3$ ):  $\delta$  162.9 (d,  $J = 250.7$  Hz, 1C), 134.3, 132.4, 132.3, 130.7, 130.4 (d,  $J = 4.3$  Hz, 1C), 124.6 (d,  $J = 6.3$  Hz, 1C), 122.9, 121.1 (d,  $J = 24.4$  Hz, C), 119.3 (d,  $J = 20.5$  Hz, C), 11.4.  $^{19}\text{F}$  (564 MHz,  $\text{CD}_3\text{COCD}_3$ ):  $\delta$  -110.49 (s, 1F), -149.74 (s, 4F).  $^{11}\text{B}$  (192 MHz,  $\text{CD}_3\text{COCD}_3$ ):  $\delta$  -1.89 (s, 1B).

**Methyldiphenyltelluronium tetrafluoroborate (3b):** according to the general procedure starting from diphenyltellane, white solid (90%, 121 mg).  $^1\text{H}$  NMR (600 MHz, MeOD):  $\delta$  7.72-7.71 (m, 4H), 7.59-7.56 (m, 2H), 7.54-7.51 (m, 4H), 2.74 (s, 3H).  $^{13}\text{C}\{^1\text{H}\}$  NMR (150 MHz, MeOD):  $\delta$  133.7, 131.7, 130.2, 124.1, 10.7.  $^{19}\text{F}$  (564 MHz, MeOD):  $\delta$  -154.4 (s, 4F).  $^{11}\text{B}$  (192 MHz, MeOD):  $\delta$  -2.11 (s, 1B).<sup>[2]</sup>



(3-Fluorophenyl)(methyl)(phenyl)telluronium tetrafluoroborate (3a)

$^1\text{H NMR}$  (600 MHz,  $\text{CD}_3\text{COCD}_3$ )

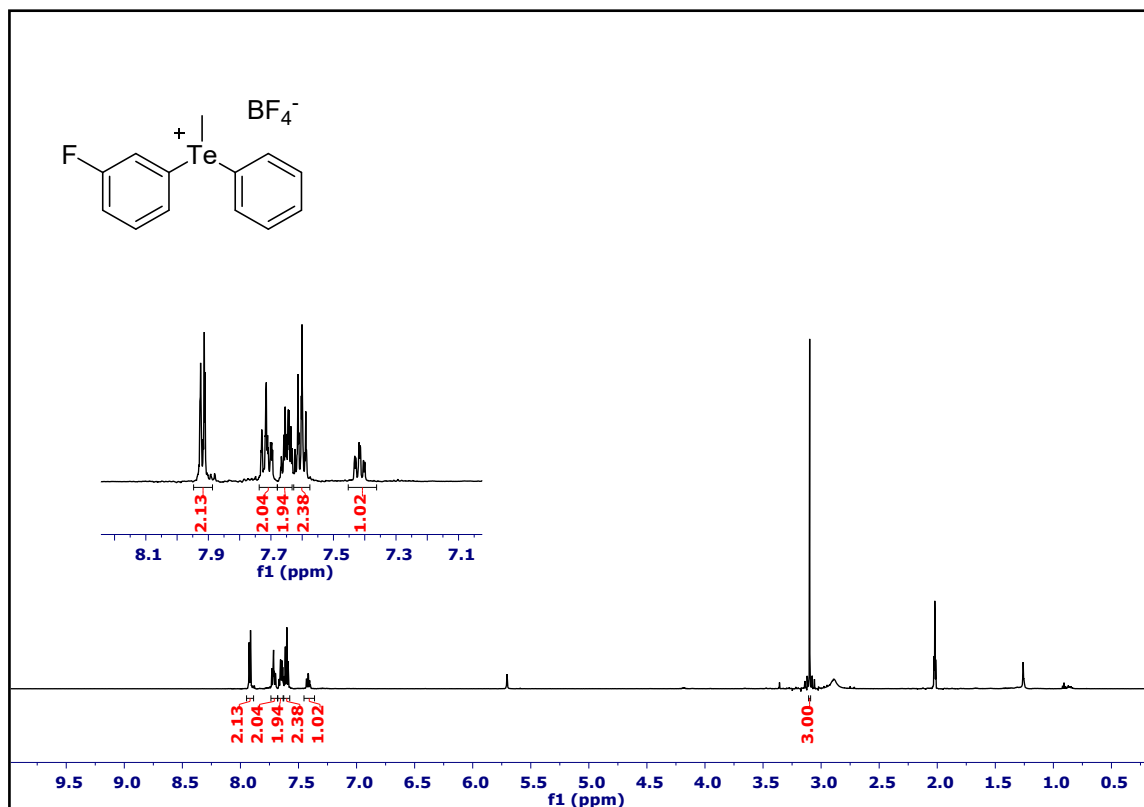

$^{13}\text{C NMR}$  (150 MHz,  $\text{CD}_3\text{COCD}_3$ )

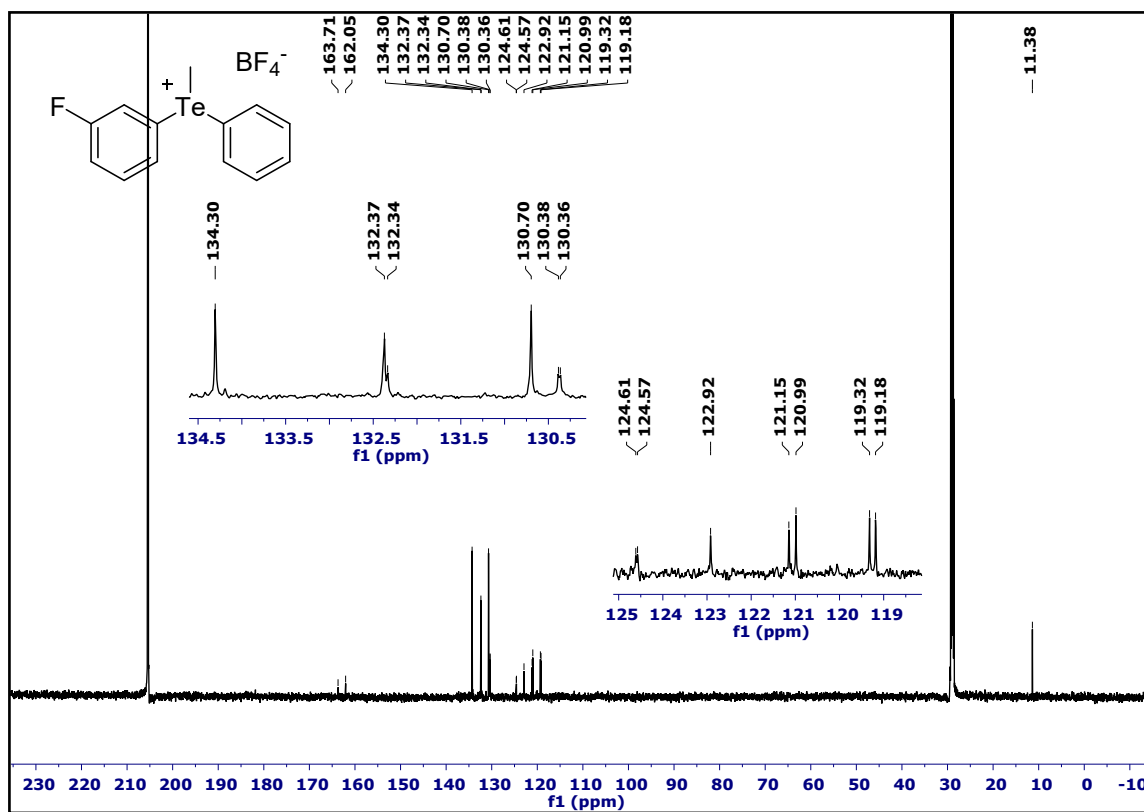

Methyldiphenyltelluronium tetrafluoroborate (3b)

$^1\text{H}$  NMR (600 MHz, MeOD)

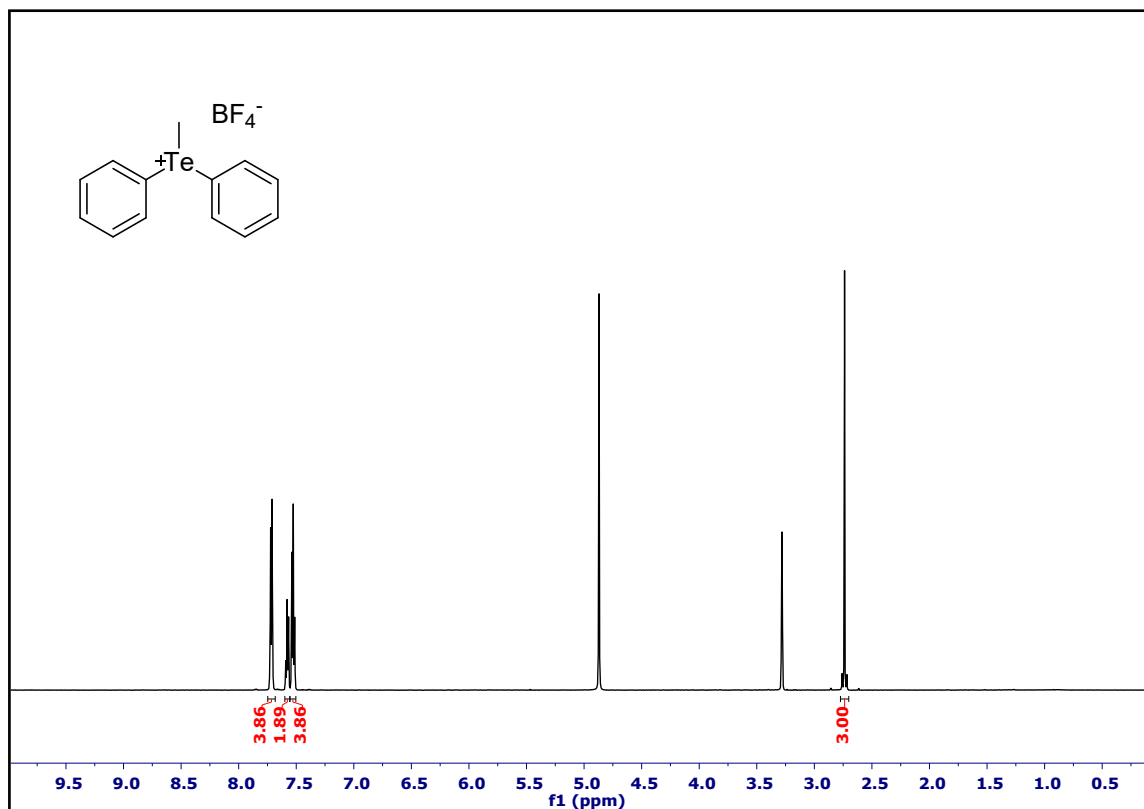

$^{13}\text{C}$  NMR (150 MHz, MeOD)

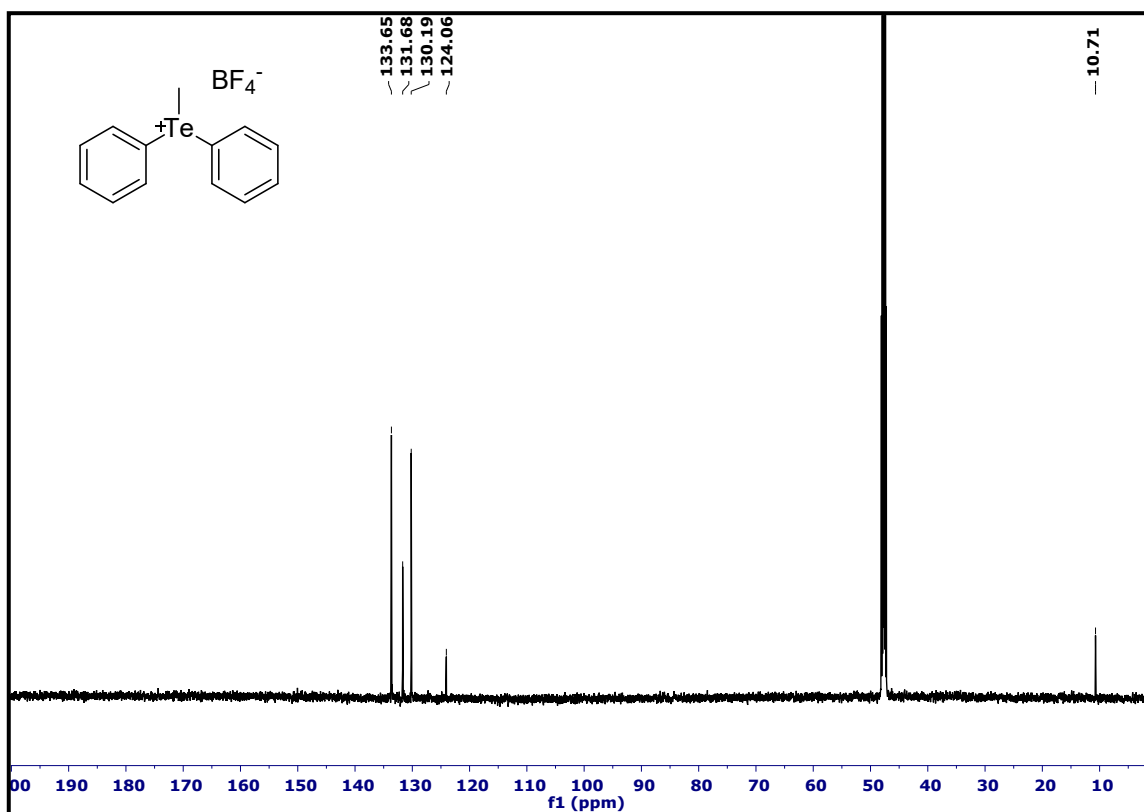

## Reference

- [1] A. Kumar, S. Kumar, *Tetrahedron* **2014**, *70*, 1763-1772.
- [2] R. Weiss, E. Aubert, P. Pale, V. Mamane, *Angew. Chem. In. Ed.* **2021**, *133*, 19430-19435.
